# Supplementary material
Source: publisher figshare collection journal article supplement (https://springernature.figshare.com/ndownloader/files/22316883)
Supplement: Supplementary file 1 [file 22316883]

Measurement(s),air pollution • greenhouse gas • temporal measurement
Technology Type(s),computational modeling technique
Factor Type(s),sector • geographic location
Sample Characteristic - Environment,climate system
Sample Characteristic - Location,Earth (planet)
